# Supplementary material for: Psychotherapy Disruption Before and After the Transition to Virtual Mental Health Care Induced by the COVID-19 Pandemic
Source: Atypon-hosted journal article supplement (doi:10.1176/appi.ps.20230181), 2023-10-11
Supplement: appi.ps.20230181.ds001.pdf [file appi.ps.20230181.ds001.pdf]

**Supplement Table 1.** Marginal effects of psychotherapy disruption from multilevel models with cross-level interactions for each mental health diagnosis and time period

| Mental Health Diagnoses                | Marginal Effect with <b>time</b> (During COVID-19 vs. Before COVID-19) |              |         |
|----------------------------------------|------------------------------------------------------------------------|--------------|---------|
|                                        | aOR                                                                    | (95% CI)     | p-value |
| <b>ADHD</b>                            |                                                                        |              |         |
| Yes                                    | 0.53                                                                   | (0.50, 0.55) | <0.001  |
| No                                     | 0.45                                                                   | (0.44, 0.46) | <0.001  |
| <b>Anxiety Disorder</b>                |                                                                        |              |         |
| Yes                                    | 0.47                                                                   | (0.45, 0.48) | <0.001  |
| No                                     | 0.42                                                                   | (0.41, 0.44) | <0.001  |
| <b>Autism Spectrum Disorder</b>        |                                                                        |              |         |
| Yes                                    | 0.57                                                                   | (0.49, 0.65) | <0.001  |
| No                                     | 0.45                                                                   | (0.44, 0.46) | <0.001  |
| <b>Bipolar Spectrum Disorder</b>       |                                                                        |              |         |
| Yes                                    | 0.58                                                                   | (0.55, 0.62) | <0.001  |
| No                                     | 0.44                                                                   | (0.43, 0.45) | <0.001  |
| <b>Conduct/Disruptive Disorder</b>     |                                                                        |              |         |
| Yes                                    | 0.47                                                                   | (0.39, 0.57) | <0.001  |
| No                                     | 0.45                                                                   | (0.45, 0.46) | <0.001  |
| <b>Dementia</b>                        |                                                                        |              |         |
| Yes                                    | 0.50                                                                   | (0.47, 0.54) | <0.001  |
| No                                     | 0.45                                                                   | (0.44, 0.46) | <0.001  |
| <b>Depressive Disorder</b>             |                                                                        |              |         |
| Yes                                    | 0.48                                                                   | (0.47, 0.49) | <0.001  |
| No                                     | 0.39                                                                   | (0.38, 0.40) | <0.001  |
| <b>Personality Disorder</b>            |                                                                        |              |         |
| Yes                                    | 0.61                                                                   | (0.57, 0.66) | <0.001  |
| No                                     | 0.45                                                                   | (0.44, 0.46) | <0.001  |
| <b>Other Psychosis</b>                 |                                                                        |              |         |
| Yes                                    | 0.54                                                                   | (0.48, 0.6)  | <0.001  |
| No                                     | 0.45                                                                   | (0.44, 0.46) | <0.001  |
| <b>Schizophrenia Spectrum Disorder</b> |                                                                        |              |         |
| Yes                                    | 0.57                                                                   | (0.51, 0.64) | <0.001  |
| No                                     | 0.45                                                                   | (0.44, 0.46) | <0.001  |
| <b>Substance Abuse Disorder</b>        |                                                                        |              |         |
| Yes                                    | 0.49                                                                   | (0.47, 0.51) | <0.001  |
| No                                     | 0.45                                                                   | (0.44, 0.46) | <0.001  |

The estimates here represent the effect of "During COVID-19" compared to "Before COVID-19" with adjustment for number of previous psychotherapy visit and sociodemographic characteristics
